# Supplementary material for: Radiotherapy in the Management of Gastrointestinal Stromal Tumors: A Systematic Review
Source: MDPI journal article supplement (doi:10.3390/cancers14133169), 2022-06-28
Supplement: s1 [file s1]

[illegible][illegible]

|                                                                                         |                                                  |                                   |                                      |                                     |                               |                                  |                                      |                                                                                 |          |          |                                 |                                   |                                    |                                     |
|-----------------------------------------------------------------------------------------|--------------------------------------------------|-----------------------------------|--------------------------------------|-------------------------------------|-------------------------------|----------------------------------|--------------------------------------|---------------------------------------------------------------------------------|----------|----------|---------------------------------|-----------------------------------|------------------------------------|-------------------------------------|
| described?                                                                              |                                                  |                                   |                                      |                                     |                               |                                  |                                      |                                                                                 |          |          |                                 |                                   |                                    |                                     |
| 5. Was the intervention(s) or treatment procedure(s) clearly described?                 | No                                               | No                                | Yes                                  | No                                  | Yes                           | No                               | Yes                                  | Yes                                                                             | Yes      | Yes      | No                              | No                                | Yes                                | Yes                                 |
| 6. Was the post-intervention clinical condition clearly described?                      | No                                               | No                                | Yes                                  | Yes                                 | No                            | Yes                              | Yes                                  | Yes                                                                             | Yes      | Yes      | Yes                             | No                                | No                                 | Yes                                 |
| 7. Were adverse events (harms) or unanticipated events identified and described?        | No                                               | No                                | Yes                                  | No                                  | No                            | No                               | No                                   | No                                                                              | No       | No       | No                              | No                                | No                                 | No                                  |
| 8. Does the case report provide takeaway lessons?                                       | Yes                                              | Yes                               | Yes                                  | Yes                                 | Yes                           | Yes                              | Yes                                  | Yes                                                                             | Yes      | Yes      | Yes                             | Yes                               | Yes                                | Yes                                 |
| 9. Was the case report presented according to CARE checklist?                           | No                                               | No                                | No                                   | No                                  | No                            | No                               | No                                   | No                                                                              | No       | No       | No                              | Yes                               | No                                 | No                                  |
| Methodological quality*                                                                 | Low                                              | Low                               | Low                                  | Low                                 | Low                           | Low                              | Moderate                             | Moderate                                                                        | Moderate | Moderate | Low                             | Low                               | Low                                | Moderate                            |
| Checklist questions                                                                     | Katayana<br>gi et al.<br>al.2019 <sup>[32]</sup> | Yilmaz et al.2020 <sup>[17]</sup> | Carvalho et al.2020 <sup>[18]</sup>  | Andruska et al.2020 <sup>[21]</sup> | Lo et al.2020 <sup>[33]</sup> | Maria et al.2022 <sup>[20]</sup> | Al-Jarani et al.2022 <sup>[54]</sup> | Checklist questions                                                             |          |          | Baik et al.2007 <sup>[45]</sup> | Cuaron et al.2013 <sup>[11]</sup> | Joensuu et al.2015 <sup>[47]</sup> | Rathmann et al.2015 <sup>[49]</sup> |
| 1. Were patient's demographic characteristics clearly described?                        | Yes                                              | Yes                               | Yes                                  | Yes                                 | Yes                           | Yes                              | Yes                                  | 1. Were there clear criteria for case inclusion?                                |          |          | No                              | No                                | Yes                                | No                                  |
| 2. Was the patient's history clearly described and presented as a timeline?             | Yes                                              | Yes                               | Yes                                  | Yes                                 | Yes                           | Yes                              | No                                   | 2. Were standard, credible methods used to identify disease or health problems? |          |          | Yes                             | No                                | Yes                                | Yes                                 |
| 3. Was the current clinical condition of the patient on presentation clearly described? | No                                               | Yes                               | Yes                                  | Yes                                 | Yes                           | Yes                              | Yes                                  | 3. Were effective methods used to diagnose disease or health problems?          |          |          | Yes                             | No                                | Yes                                | Yes                                 |
| 4. Were diagnostic tests or assessment methods and the results clearly described?       | Yes                                              | Yes                               | Yes                                  | Yes                                 | Yes                           | Yes                              | No                                   | 4. Was the inclusion of patients consistent?                                    |          |          | Yes                             | Yes                               | No                                 | Yes                                 |
| 5. Was the intervention(s) or treatment procedure(s) clearly described?                 | Yes                                              | Yes                               | No                                   | Yes                                 | Yes                           | Yes                              | No                                   | 5. Was the inclusion of patients comprehensive?                                 |          |          | No                              | No                                | No                                 | No                                  |
| 6. Was the post-intervention clinical condition clearly described?                      | No                                               | Yes                               | No                                   | No                                  | No                            | Yes                              | No                                   | 6. Were patient's demographic characteristics clearly described?                |          |          | Yes                             | Yes                               | Yes                                | Yes                                 |
| 7. Were adverse events (harms) or unanticipated events identified and described?        | No                                               | Yes                               | No                                   | No                                  | No                            | Yes                              | Yes                                  | 7. Was the clinical information of patients clearly described?                  |          |          | Yes                             | Yes                               | Yes                                | Yes                                 |
| 8. Does the case report provide takeaway lessons?                                       | Yes                                              | Yes                               | Yes                                  | Yes                                 | Yes                           | Yes                              | Yes                                  | 8. Were outcomes or follow-up results clearly reported?                         |          |          | Yes                             | Yes                               | Yes                                | Yes                                 |
| 9. Was the case report presented according to CARE checklist?                           | No                                               | No                                | No                                   | No                                  | No                            | No                               | No                                   | 9. Was geographical/sociological information of patients clearly reported?      |          |          | No                              | No                                | No                                 | No                                  |
| Methodological quality*                                                                 | Low                                              | Moderate                          | Low                                  | Low                                 | Low                           | Moderate                         | Low                                  | Methodological quality*                                                         |          |          | Low                             | Low                               | Low                                | Low                                 |
| Checklist questions                                                                     | Omari et al.2019 <sup>[48]</sup>                 |                                   | Patterson et al.2022 <sup>[53]</sup> |                                     |                               |                                  |                                      |                                                                                 |          |          |                                 |                                   |                                    |                                     |

|                                                                                 |          |     |
|---------------------------------------------------------------------------------|----------|-----|
| 1. Were there clear criteria for case inclusion?                                | Yes      | No  |
| 2. Were standard, credible methods used to identify disease or health problems? | Yes      | No  |
| 3. Were effective methods used to diagnose disease or health problems?          | Yes      | No  |
| 4. Was the inclusion of patients consistent?                                    | Yes      | Yes |
| 5. Was the inclusion of patients comprehensive?                                 | No       | No  |
| 6. Were patient's demographic characteristics clearly described?                | Yes      | Yes |
| 7. Was the clinical information of patients clearly described?                  | Yes      | Yes |
| 8. Were outcomes or follow-up results clearly reported?                         | Yes      | Yes |
| 9. Was geographical/sociological information of patients clearly reported?      | No       | Yes |
| 10. Were statistical analysis methods appropriate?                              | Yes      | Yes |
| Methodological quality*                                                         | Moderate | Low |
